# Supplementary material
Source: publisher figshare collection journal article supplement (https://tandf.figshare.com/articles/dataset/_/2819038)
Supplement: Supplementary file 1 [file 1]

JOURNAL OF VERTEBRATE PALEONTOLOGY

SUPPLEMENTARY DATA 1

A new species of the Pleistocene furnariid *Pseudoseisuropsis* (Aves, Passeriformes)

M. IGNACIO STEFANINI,<sup>1</sup> RAÚL O. GÓMEZ,<sup>1,2</sup> and CLAUDIA P. TAMBUSSI<sup>3</sup>

<sup>1</sup>Laboratorio de Paleontología Evolutiva de Vertebrados, Departamento de Ciencias Geológicas, FCEN-UBA, Facultad de Ciencias

Exactas y Naturales, Universidad de Buenos Aires, Intendente Güiraldes 2160, Buenos Aires 1428, Argentina,

nachostefanini@gmail.com;

<sup>2</sup>CONICET, Consejo Nacional de Investigaciones Científicas y Técnicas, Buenos Aires, Argentina, raulgomez@gl.fcen.uba.ar;

<sup>3</sup>CONICET-UNC Centro de Investigaciones en Ciencias de la Tierra (CICTERRA), Universidad Nacional de Córdoba, Avenida Vélez

Sarsfield 1611, Córdoba 5016, Argentina, tambussi.claudia@conicet.gov.ar

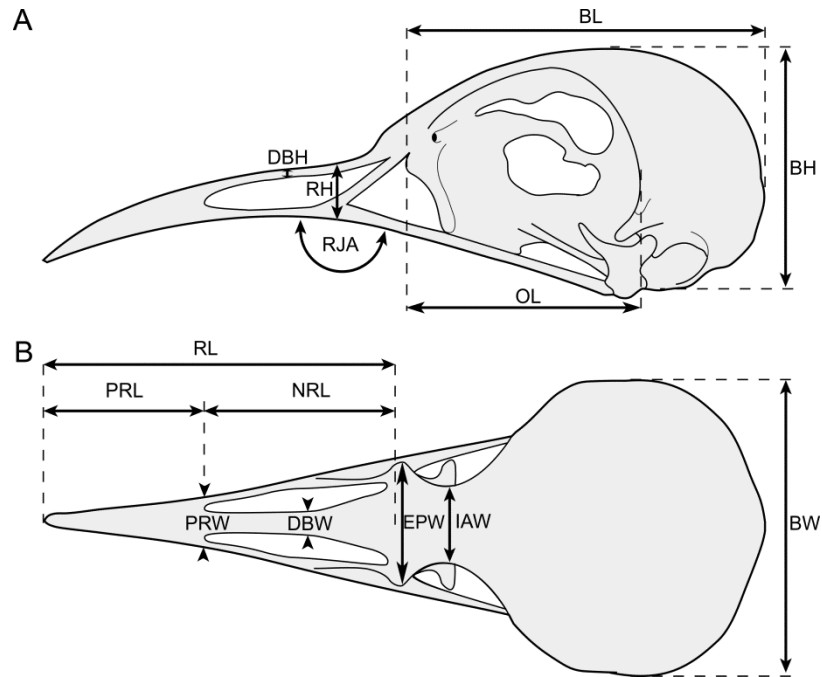

FIGURE S1. Measurements taken on examined skulls in: **A**, lateral view and **B**, dorsal view. **Abbreviations:** **BH**, braincase height; **BL**, braincase length; **BW**, braincase width; **DBH**, dorsal bar height; **DBW**, dorsal bar width; **EPW**, ectethmoid plate width; **IAW**, interorbital area width; **NRL**, narial region length; **OL**, orbit length; **PRL**, premaxillary rostrum length; **PRW**, premaxillary rostrum width; **RH**, rostrum height; **RJA**, rostrum-jugal angle; **RL**, rostrum length.

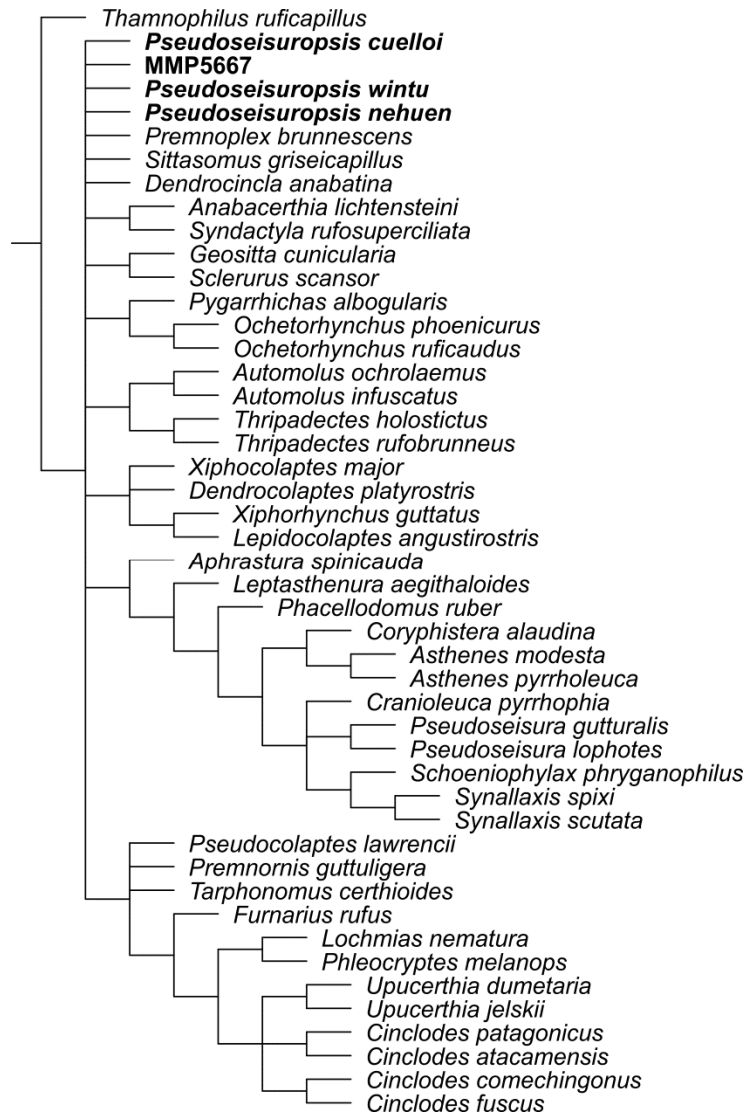

FIGURE S2. Strict consensus of 82 trees obtained in the cladistics analysis that includes all specimens ascribed to *Pseudoseisurus*.

TABLE S1. Specimens of extant species used for different analyses in this study. **Abbreviations:** **PA**, phylogenetic analyses; **CC**, coefficient of variation comparisons; **DS**, data taken from dry skulls; **DP**, data taken from photos; **DL**, data taken from literature; **UN**, uncataloged. Specimens with dash in the Analyses column were utilized only for osteological comparisons in the taxonomic analysis.

| Species                              | Analyses | n | Specimen information                             |
|--------------------------------------|----------|---|--------------------------------------------------|
| <i>Thamnophilus ruficapillus</i>     | PA       | 1 | MLP PV-OR 745, DS                                |
| <i>Sclerurus scansor</i>             | PA       | 1 | DL (Feduccia, 1973)                              |
| <i>Geositta punensis</i>             | —        | 2 | MACN 69033, DS; MLP PV-OR 375, DS                |
| <i>Geositta cunicularia</i>          | PA       | 2 | MACN 3017, MLP-A 703                             |
| <i>Dendrocincla anabatina</i>        | PA       | 1 | DL (Feduccia, 1973)                              |
| <i>Sittasomus griseicapillus</i>     | PA       | 3 | MACN 69024, DS; MLP PV-OR 377, DS; MLP-A, UN, DS |
| <i>Dendrocolaptes platyrostris</i>   | PA       | 2 | MLP PV-OR 384, DS; MLP PV-OR 386, DS             |
| <i>Xiphocolaptes major</i>           | PA       | 2 | MLP PV-OR 178, DS; MACN 53501, DS                |
| <i>Lepidocolaptes angustirostris</i> | PA       | 2 | MLP PV-OR 179, DS; MLP PV-OR 379, DS             |
| <i>Xiphorhynchus guttatus</i>        | PA       | 1 | DL (Feduccia, 1973)                              |
| <i>Ochetorhynchus ruficaudus</i>     | PA       | 1 | MACN 68980, DS                                   |
| <i>Ochetorhynchus phoenicurus</i>    | PA       | 1 | MACN 68708, DS                                   |

|                                        |        |    |                                                                                                                        |
|----------------------------------------|--------|----|------------------------------------------------------------------------------------------------------------------------|
| <i>Pygarrhichas albogularis</i>        | PA     | 2  | MACN 2337, DS; MACN 68714, DS                                                                                          |
| <i>Cinclodes atacamensis</i>           | PA     | 2  | MACN 1304, DS; MACN 69032, DS                                                                                          |
| <i>Cinclodes nigrofumosus</i>          | —      | 1  | USNM 637977; DP                                                                                                        |
| <i>Cinclodes fuscus</i>                | PA     | 2  | MACN 18036, DS; MLP 198, DS                                                                                            |
| <i>Cinclodes comechingonus</i>         | PA     | 1  | AMNH 23939, DP                                                                                                         |
| <i>Cinclodes oustaleti</i>             | —      | 1  | USNM 490935; DP                                                                                                        |
| <i>Upucerthia jelskii</i>              | PA     | 1  | UF 27373, DP                                                                                                           |
| <i>Upucerthia dumetaria</i>            | PA     | 4  | MACN 0340, DS; MACN 0352, DS; MACN 23966, DS; MLP 388, DS                                                              |
| <i>Lochmias nematura</i>               | PA     | 1  | AMNH 23939, DP                                                                                                         |
| <i>Limnornis curvirostris</i>          | —      | 1  | MACN 23896, DS                                                                                                         |
| <i>Phleocryptes melanops</i>           | PA     | 2  | MLP PV-OR 128, DS; UF 39223, DP                                                                                        |
| <i>Furnarius leucopus longirostris</i> | CC     | 1  | USNM 289816, DP                                                                                                        |
| <i>Furnarius figulus</i>               | CC     | 1  | USNM 562254, DP                                                                                                        |
| <i>Furnarius torridus</i>              | CC     | 1  | USNM 345975, DP                                                                                                        |
| <i>Furnarius rufus</i>                 | PA; CC | 15 | MLP PV-OR 135, DS; MLP PV-OR 216, DS; MLP-A 691, DS; MLP-A 699, DS; MLP-A 714, DS; MLP-A 715, DS; MACN 54718, DS; MACN |

|                                    |    |   |                                                                                                                                   |
|------------------------------------|----|---|-----------------------------------------------------------------------------------------------------------------------------------|
|                                    |    |   | 1370a, DS; MACN 23991, DS; MACN 68362, DS; MACN 68647, DS;<br>MACN 54703, DS; MACN 2299a, DS; USNM 614680, DP; USNM<br>345974, DP |
| <i>Tarphonomus certhioides</i>     | PA | 2 | MLP 202, DS; MACN 69001, DS                                                                                                       |
| <i>Premnornis guttuligera</i>      | PA | 1 | UF 43380, DP                                                                                                                      |
| <i>Pseudocolaptes lawrencii</i>    | PA | 1 | UF 27386, DP                                                                                                                      |
| <i>Syndactyla rufosuperciliata</i> | PA | 4 | MLP 124, DS; MLP 133, DS; MACN 54553, DS; MACN 54554, DS                                                                          |
| <i>Anabacerthia lichtensteini</i>  | PA | 1 | USNM 556416, DP                                                                                                                   |
| <i>Thripadectes rufobrunneus</i>   | PA | 1 | UF 27388, DP                                                                                                                      |
| <i>Thripadectes holostictus</i>    | PA | 1 | AMNH 25982, DP                                                                                                                    |
| <i>Automolus infuscatus</i>        | PA | 1 | USNM 622329, DP                                                                                                                   |
| <i>Automolus ochrolaemus</i>       | PA | 2 | USNM 637258, DP; DL (Feduccia, 1973)                                                                                              |
| <i>Premnoplex brunnescens</i>      | PA | 1 | AMNH 25979, DP                                                                                                                    |
| <i>Aphrastura spinicauda</i>       | PA | 3 | MLP PV-OR 237, DS; MACN 7027, DS; MACN 68720, DS                                                                                  |
| <i>Leptasthenura aegithaloides</i> | PA | 1 | MACN 68711, DS                                                                                                                    |
| <i>Leptasthenura fuliginiceps</i>  | —  | 1 | MACN 69019; DS                                                                                                                    |

|                                      |    |   |                                                      |
|--------------------------------------|----|---|------------------------------------------------------|
| <i>Phacellodomus ruber</i>           | PA | 1 | MACN 68121, DS                                       |
| <i>Phacellodomus striaticollis</i>   | —  | 1 | MLP PV-OR 125, DS                                    |
| <i>Annumbius anumbi</i>              | —  | 3 | MLP PV-OR 131, DS; MLP PV-OR 134, DS; MLP-A U        |
| <i>Coryphistera alaudina</i>         | PA | 1 | MACN 68123, DS                                       |
| <i>Asthenes baeri</i>                | —  | 1 | MLP PV-OR 132, DS                                    |
| <i>Asthenes pyrrholeuca</i>          | PA | 1 | MACN 23961, DS                                       |
| <i>Asthenes modesta</i>              | PA | 2 | MACN 54552, DS; DL (Feduccia, 1973)                  |
| <i>Cranioleuca pyrrhophia</i>        | PA | 3 | MACN 68369, DS; MACN 68378, DS; USNM 630991, DP      |
| <i>Pseudoseisura lophotes</i>        | PA | 2 | MLP PV-OR 126, DS; MLP PV-OR 201, DS                 |
| <i>Pseudoseisura gutturalis</i>      | PA | 1 | MACN 0235, DS                                        |
| <i>Schoeniophylax phryganophilus</i> | PA | 3 | MLP PV-OR 138, DS; MLP PV-OR 236, DS; MACN 68453, DS |
| <i>Synallaxis spixi</i>              | PA | 1 | MACN 68653, DS                                       |
| <i>Synallaxis frontalis</i>          | —  | 1 | MACN 68606, DS                                       |
| <i>Synallaxis scutata</i>            | PA | 1 | MLP PV-OR 382, DS                                    |

---

TABLE S2. Measures (in millimeters) of the morphometric traits of *Furnarius rufus* specimens and three additional *Furnarius* species used for coefficient of variations comparisons. **Abbreviations:** **BL**, braincase length; **BW**, braincase width; **DBW**, dorsal bar width; **EPW**, ectethmoid plate width; **IAW**, interorbital area width; **PRL**, premaxillary rostrum length; **PRW**, premaxillary rostrum width; **RL**, rostrum length.

| Species                | PRL   | DBW  | PRW  | RL    | EPW  | IAW  | BW    | BL    | Specimen   |
|------------------------|-------|------|------|-------|------|------|-------|-------|------------|
| <i>Furnarius rufus</i> | —     | 1.63 | 3.98 | —     | 9.34 | 4.95 | 18.13 | 25.24 | MLP-A 691  |
| <i>Furnarius rufus</i> | —     | 1.40 | —    | —     | 9.21 | 4.75 | 18.11 | 25.67 | MLP-A 699  |
| <i>Furnarius rufus</i> | —     | 1.62 | 3.63 | —     | 8.85 | 4.33 | 18.85 | 25.68 | MLP-A 714  |
| <i>Furnarius rufus</i> | —     | 1.68 | 3.55 | —     | 8.44 | 4.56 | 19.36 | 25.43 | MLP-A 715  |
| <i>Furnarius rufus</i> | 9.41  | 1.44 | 3.24 | 19.57 | 8.03 | 4.70 | 19.04 | 25.90 | 54718 MACN |
| <i>Furnarius rufus</i> | 10.77 | 1.79 | 3.39 | 23.23 | 8.06 | 4.59 | 18.45 | 25.23 | 1370a MACN |
| <i>Furnarius rufus</i> | —     | 1.46 | 3.18 | —     | 8.61 | 4.33 | 19.34 | 25.63 | 23991 MACN |
| <i>Furnarius rufus</i> | —     | 1.26 | 3.11 | —     | 8.68 | 3.93 | 19.14 | 26.82 | 68362 MACN |
| <i>Furnarius rufus</i> | —     | 1.23 | 3.10 | —     | 8.58 | 4.63 | 19.10 | 24.71 | 68647 MACN |
| <i>Furnarius rufus</i> | —     | 1.75 | 2.99 | —     | 8.64 | 4.52 | 18.57 | 26.04 | 54703 MACN |
| <i>Furnarius rufus</i> | —     | 1.57 | 3.33 | —     | 9.17 | 4.62 | 18.61 | 25.74 | 2299a MACN |



|                                        |       |      |      |       |      |      |       |       |             |
|----------------------------------------|-------|------|------|-------|------|------|-------|-------|-------------|
| <i>Furnarius rufus</i>                 | 8.30  | 1.57 | 2.94 | 19.35 | 8.76 | 4.54 | 18.82 | 25.62 | 135 MLP     |
| <i>Furnarius rufus</i>                 | 9.67  | 1.70 | 3.01 | 18.76 | 8.63 | 4.62 | 18.82 | 25.88 | 216 MLP     |
| <i>Furnarius rufus</i>                 | 8.99  | 1.51 | 3.41 | 19.44 | 8.10 | 4.20 | 18.10 | 24.19 | USNM 614680 |
| <i>Furnarius rufus</i>                 | 9.70  | 1.45 | 3.20 | 20.70 | 8.84 | 4.16 | 17.79 | 23.63 | USNM 345974 |
| <i>Furnarius torridus</i>              | 11.51 | 1.52 | 3.05 | 23.24 | 7.81 | 4.30 | 17.22 | 23.95 | USNM 345975 |
| <i>Furnarius leucopus longirostris</i> | 13.02 | 1.55 | 3.60 | 24.36 | 9.17 | 4.21 | 17.30 | 23.23 | USNM 289816 |
| <i>Furnarius figulus</i>               | 8.51  | 1.07 | 2.50 | 18.56 | 6.50 | 3.13 | 16.09 | 21.71 | USNM 562254 |

---
